# Supplementary material for: A prospective survey of the persistence of warfarin or NOAC in nonvalvular atrial fibrillation: a COmparison study of Drugs for symptom control and complication prEvention of Atrial Fibrillation (CODE-AF)
Source: PubMed Central journal article supplement — Korean J Intern Med. 2019 Apr 25;35(1):99–108. doi: 10.3904/kjim.2017.415 (PMC6960047; doi:10.3904/kjim.2017.415), 2019-04-25
Supplement: kjim-2017-415-suppl2.pdf [file kjim-2017-415-suppl2.pdf]

**Supplementary Table 2. Baseline characteristics of patients in new-start group analysis**

| Characteristic                         | VKA<br>(n = 765) | Dabigatran<br>(n = 714) | Apixaban<br>(n = 1,054) | Rivaroxaban<br>(n = 648) | Edoxaban<br>(n = 200) |
|----------------------------------------|------------------|-------------------------|-------------------------|--------------------------|-----------------------|
| Male sex                               | 62.2             | 60.9                    | 51.0                    | 53.5                     | 50.0                  |
| Age, yr                                | 72.3 ± 8.1       | 70 ± 8.1                | 72.7 ± 8.5              | 71.2 ± 8.4               | 71.6 ± 9.4            |
| BMI, kg/m <sup>2</sup>                 | 24.4 ± 3.5       | 25.1 ± 3.3              | 24.5 ± 3.5              | 24.7 ± 3.4               | 24.6 ± 3.4            |
| Type of AF, %                          |                  |                         |                         |                          |                       |
| Paroxysmal                             | 63.7             | 62.0                    | 61.2                    | 61.1                     | 51.5                  |
| Persistent                             | 30.2             | 34.3                    | 34.3                    | 31.6                     | 44.5                  |
| Permanent                              | 4.4              | 2.5                     | 3.6                     | 5.6                      | 2.0                   |
| CHA <sub>2</sub> DS <sub>2</sub> -VASc | 3.5 ± 1.4        | 3.3 ± 1.2               | 3.7 ± 1.4               | 3.6 ± 1.3                | 3.2 ± 1.2             |
| HAS-BLED                               | 2.9 ± 1.0        | 2.0 ± 0.8               | 2.1 ± 0.8               | 2.0 ± 0.8                | 1.9 ± 0.8             |
| Valve disease, %                       | 17.6             | 8.6                     | 11.6                    | 11.6                     | 11.0                  |
| Heart failure, %                       | 14.2             | 13.0                    | 13.5                    | 12.0                     | 10.5                  |
| Hypertension, %                        | 77.8             | 79.8                    | 82.6                    | 78.2                     | 78.0                  |
| Diabetes mellitus, %                   | 36.1             | 33.8                    | 35.9                    | 35.3                     | 29.5                  |
| History of stroke/TIA, %               | 21.7             | 22.7                    | 23.2                    | 25.8                     | 11.0                  |
| History of MI, %                       | 4.8              | 4.2                     | 3.7                     | 3.9                      | 1.5                   |
| History of PAD, %                      | 7.7              | 6.6                     | 8.1                     | 7.4                      | 4.5                   |
| Cancer, %                              | 8.4              | 9.5                     | 14.4                    | 8.6                      | 17.5                  |
| CKD, %                                 | 21.2             | 3.8                     | 15.0                    | 9.7                      | 8.5                   |
| Dyslipidemia, %                        | 39.0             | 41.5                    | 45.2                    | 42.4                     | 33.5                  |
| History of bleeding, %                 | 11.8             | 7.9                     | 12.0                    | 10.6                     | 11.0                  |

Values are presented as percentage or mean ± SD.

VKA, vitamin K antagonist; BMI, body mass index; AF, atrial fibrillation; CHA<sub>2</sub>DS<sub>2</sub>-VASc, congestive heart failure, hypertension, age 75 years or older, diabetes mellitus, previous stroke/transient ischemic attack, vascular disease, age 65–74 years, sex category (female); HAS-BLED, hypertension, abnormal renal/liver function, stroke, bleeding history or predisposition, labile international normalized ratio, elderly, drugs/alcohol concomitantly; TIA, transient ischemic attack; MI, myocardial infarction; PAD, peripheral artery disease; CKD, chronic kidney disease.
