# Supplementary material for: A prospective survey of the persistence of warfarin or NOAC in nonvalvular atrial fibrillation: a COmparison study of Drugs for symptom control and complication prEvention of Atrial Fibrillation (CODE-AF)
Source: PubMed Central journal article supplement — Korean J Intern Med. 2019 Apr 25;35(1):99–108. doi: 10.3904/kjim.2017.415 (PMC6960047; doi:10.3904/kjim.2017.415), 2019-04-25
Supplement: kjim-2017-415-suppl3.pdf [file kjim-2017-415-suppl3.pdf]

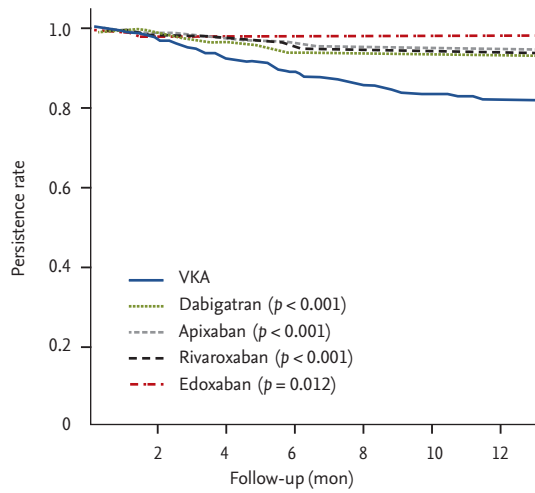

| No. at risk |     |     |     |     |     |     |     |
|-------------|-----|-----|-----|-----|-----|-----|-----|
| VKA         | 732 | 713 | 645 | 528 | 435 | 335 | 224 |
| Dabigatran  | 638 | 624 | 569 | 483 | 417 | 323 | 208 |
| Apixaban    | 932 | 912 | 812 | 693 | 587 | 446 | 233 |
| Rivaroxaban | 591 | 577 | 543 | 474 | 402 | 320 | 169 |
| Edoxaban    | 135 | 129 | 103 | 76  | 38  | 24  | 17  |

**Supplementary Figure 1.** Kaplan-Meier curve free from persistence in the maintenance group (60 days before enrollment). VAK, vitamin K antagonist.
